# Supplementary material for: RBM10 regulates alternative splicing of lncRNA Neat1 to inhibit the invasion and metastasis of NSCLC
Source: PubMed Central journal article supplement (PMC9636673; doi:10.1186/s12935-022-02758-w), 2022-11-05

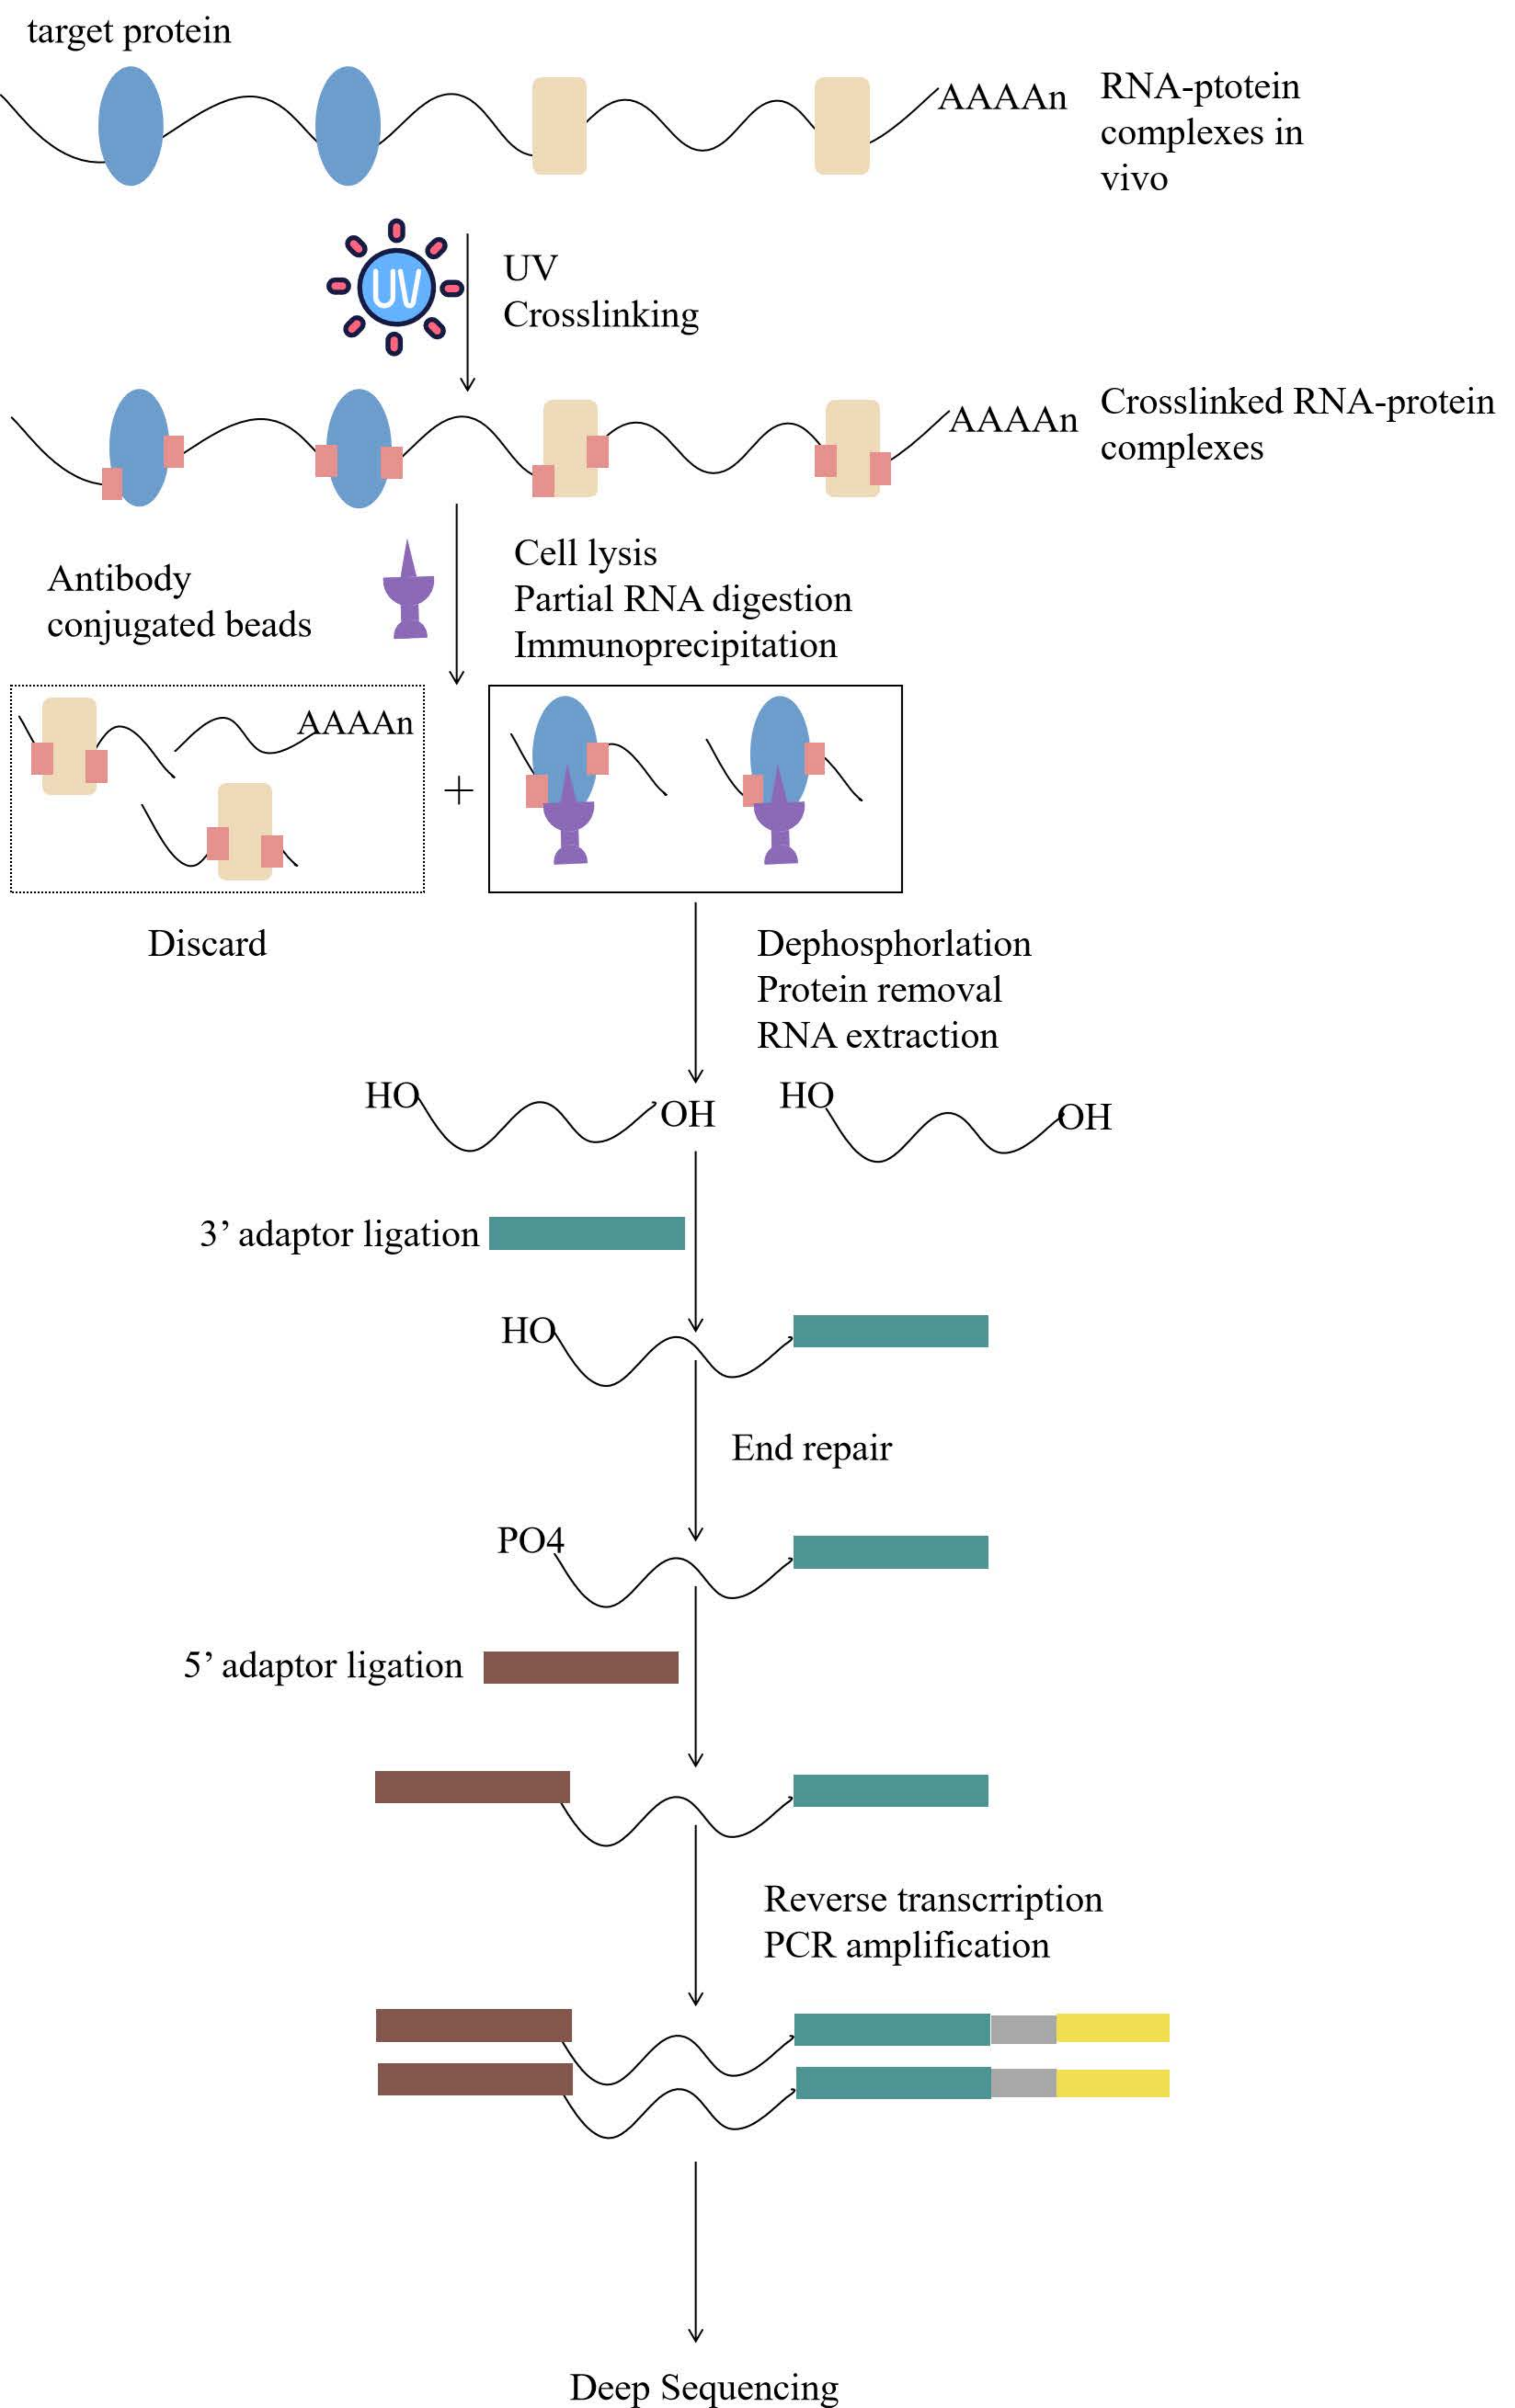

Supplement: 12935_2022_2758_MOESM1_ESM.pdf [file 12935_2022_2758_MOESM1_ESM.pdf]
